# Supplementary material for: Optimization of the hygrosensitive response characteristics of a polyacrylate humidity sensor using halloysite nanotubes
Source: Royal Society of Chemistry journal article supplement (doi:10.1039/d4tc04901b), 2025-01-01
Supplement: d4tc04901b1.pdf [file d4tc04901b1.pdf]

**Graphical Abstract Image**
